# Supplementary material
Source: ML conference proceedings conference paper supplement (https://proceedings.neurips.cc/paper_files/paper/2020/hash/d90e5b6628b4291225cba0bdc643c295-Abstract.html)
Supplement: Supplementary file [file d90e5b6628b4291225cba0bdc643c295-Supplemental.zip]

---

# Appendix

---

Anonymous Author(s)

Affiliation

Address

email

## A Experiment Details

We provide an introduction to the dataset, the implementation details, and the comparison methods.

### A.1 Dataset Details

In this paper, we apply a play-by-play dataset constructed by NAME (name withheld to preserve anonymity). They capture the information of an on-puck player (player possessing the puck) from broadcast videos with computer vision techniques. Table 4 shows a complete set of features.

Table 4: The complete list of features. The table utilizes adjusted spatial coordinates where negative numbers denote the defensive zone of the acting player and positive numbers denote his offensive zone. Adjusted X-coordinates run from -100 to +100 and Adjusted Y-coordinates from 42.5 to -42.5, where the origin is at the ice center.

| Type              | Name                                | Range                                       |
|-------------------|-------------------------------------|---------------------------------------------|
| Spatial Features  | X Coordinate of Puck                | $[-100, 100]$                               |
|                   | Y Coordinate of Puck                | $[-42.5, 42.5]$                             |
|                   | Velocity of Puck                    | $(-\infty, +\infty)$                        |
|                   | Angle between the puck and the goal | $[-3.14, 3.14]$                             |
| Temporal Features | Game Time Left                      | $[0, 3,600]$                                |
|                   | Event Duration                      | $(0, +\infty)$                              |
| In-Game Features  | Score Differential                  | $(-\infty, +\infty)$                        |
|                   | Manpower Situation                  | {Even Strength, Shorted Handed, Power Play} |
|                   | Home or Away Team                   | {Home, Away}                                |
|                   | Action Outcome                      | {successful, failure}                       |

### A.2 Implementation Details.

**Running settings.** All the models (including our VaRLAE and other comparison models) are implemented by Tensorflow 1.15 (the source code has been uploaded as supplementary materials). The models are trained by mini-batch stochastic gradient descent (with batch size 32) applying Adam optimizer. The learning rate is set to  $1E-5$ . To validate our model, we randomly divide the NHL dataset containing 1,196 games into a training set (80%), a validation set (10%), and a testing set (10%) and implement 5 independent runs. In each run, the models are trained for a total of 10 epochs (over 40M events), and testing is implemented by the hold-out validation. In this paper, we report the results in the format of mean  $\pm$  variance computed across these 5 runs. All the experiments are run on a local machine with 32 GB main memory, a TITAN X GPU (12 GB memory), and a GeForce GTX 1080 GPU (12 GB memory).

18 **Model settings.** Within our VaRLAE, the dimensions of latent variables  $\mathbf{z}_s$ ,  $\mathbf{z}_a$  and  $\mathbf{z}_r$  are set to  
 19 64, 64 and 32 respectively (following [1]). The sizes of other hidden layers (in both LSTM and MLP)  
 20 are set to 256. The max trace length of LSTM is set to 10 following previous works [2, 3].

### 21 A.3 A Summary for Comparison methods

22 Table 5 summarizes the differences between these comparison methods and our model. our VaR-  
 23 LAE applies a hierarchy of latent variables to embed players. To make fair comparisons, we set the  
 24 dimension of the embedding vector to 256 for all comparison methods.

25 **N/A** indicates no player information is applied and **Pids** indicates that we directly input one-hot  
 26 player ids to the downstream application models.

27 **Deterministic Encoder (DE) [4]:** DE applies a conditional auto-encoder structure. DE maps the  
 28 current observations ( $\mathbf{o}_t, \mathbf{a}_t, \mathbf{r}_t, \mathbf{p}_t^l$ ) to the acting players by minimizing a reconstruction loss. It does  
 29 not model the game history.

30 **Conditional Variational Auto-Encoder (CVAE) [5]:** Our implementation of CVAE follows our  
 31 player representation framework (Section 3.2). It learns a player representation conditioning current  
 32 observations:  $q(\mathbf{z}_t | \mathbf{o}_t, \mathbf{a}_t, \mathbf{r}_t, \mathbf{p}_t^l)$  (without modeling the game history).

33 **Multi-Agent Behavior Encoder (MA-BE)[6]:** MA-BE applies a policy embedding framework and  
 34 models the behavior of players by imitation learning. To identify the embedding for different agents,  
 35 MA-BE introduces an exponential triple loss to punish the similarity among embeddings for different  
 36 players. The scale of triple loss is controlled by a hyper-parameter ( $\lambda$ ). A large  $\lambda$  produces well-  
 37 distinguished player embeddings, but it also generates huge loss variance which leads to large gradient  
 38 and undermines the model convergence. When we apply MA-BE to learn the player representations,  
 39 we find it hard to determine such a  $\lambda$  that can adequately facilitate both the player identification and  
 40 model convergence, given the large number of players and the unbalanced representation. In the  
 41 experiment, we examine different  $\lambda$  and obtain a reasonable model performance when  $\lambda = 0.0001$ .

42 **Conditional Variational RNN (CVRNN):** CVRNN implements a VRNN [7] conditioning on the  
 43 game context. CVRNN includes a CVAE at each RNN cell. It models the game history with RNN  
 44 hidden states and learns a contextualized player representation  $q(\mathbf{z}_t | \mathbf{s}_t, \mathbf{a}_t, \mathbf{r}_t, \mathbf{p}_t^l)$  following our  
 45 player representation framework (Section 3.2).

46 **Conditional Auto-Encoder RNN (CAERNN):** CAERNN applies a similar implementation to  
 47 CVRNN except, at each RNN cell, it replaces the Variational Auto-Encoder with a determinis-  
 48 tic Auto-Encoder.

Table 5: A summary of comparison methods.

|        | Hierarchical<br>Embedding | Game<br>History | Stochastic-<br>Model | Continuous-<br>Value Embedding | Player-<br>Information | Policy-<br>Representation |
|--------|---------------------------|-----------------|----------------------|--------------------------------|------------------------|---------------------------|
| N/A    | No                        | No              | No                   | No                             | No                     | No                        |
| Pids   | No                        | No              | No                   | No                             | Yes                    | No                        |
| DE     | No                        | No              | No                   | Yes                            | Yes                    | No                        |
| CVAE   | No                        | No              | Yes                  | Yes                            | Yes                    | No                        |
| MA-BE  | No                        | Yes             | No                   | Yes                            | Yes                    | Yes                       |
| CAERNN | No                        | Yes             | No                   | Yes                            | Yes                    | No                        |
| CVRNN  | No                        | Yes             | Yes                  | Yes                            | Yes                    | No                        |
| VaRLAE | Yes                       | Yes             | Yes                  | Yes                            | Yes                    | No                        |

## 49 B A Spatial Illustration for the Shot Attempts

50 We randomly sample 20 games from the training data and show a spatial illustration of shots that  
 51 happened during these games in Figure 4. This plot is consistent with our description (section 5.3)  
 52 that the training data is highly imbalanced and only a few shot attempts lead to a goal. The plot also  
 53 shows that the locations of the successful and the unsuccessful shots are highly overlapped. Without  
 54 knowing the identity of the acting player, it is hard to determine whether the shot can be made or not.

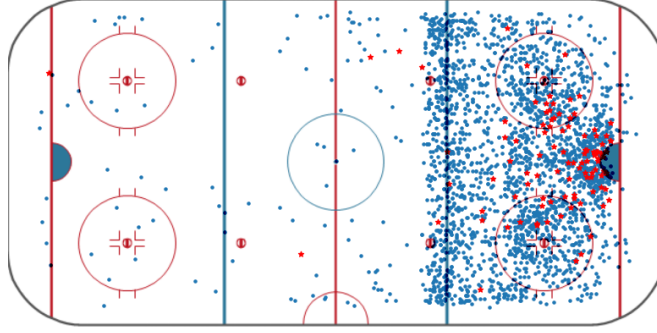

Figure 4: The spatial illustration of shot attempts on a hockey rink. We apply the adjusted coordinate (see Table 4) and the play always flows from left to right. Blue circles represent unsuccessful shots and red stars indicate successful shot.

## 55 C Additional Results

### 56 C.1 Embedding Visualization

57 We visualize the embeddings generated by our VaRLAE and CAERNN to compare the difference  
 58 between a stochastic encoder and a deterministic encoder. In our paper, we label the embedding  
 59 with players' positions, names, and locations. Here, we complement these visualizations by further  
 labeling the action types of players (the visualization method is explained in our paper.).

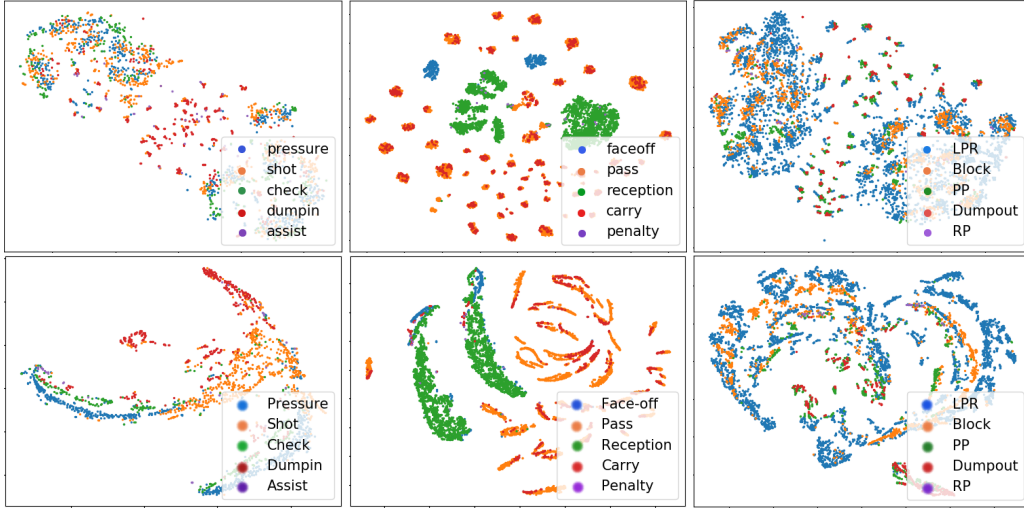

Figure 5: Embedding visualization. Each data point corresponds to a player embedding conditioning on the game context at the current time step  $t$ . The player embeddings are labelled by the action types. The embeddings are computed by VaRLAE (*top plots*) and CAERNN (*bottom plots*).

60

### 61 C.2 Temporal Illustrations of the Absolute Error

62 To show more details of the predicted score difference results, we separately illustrate the  
 63 mean  $\pm$  variance plot (Figure 3 in Section 5.3) for all the evaluated embedding methods.

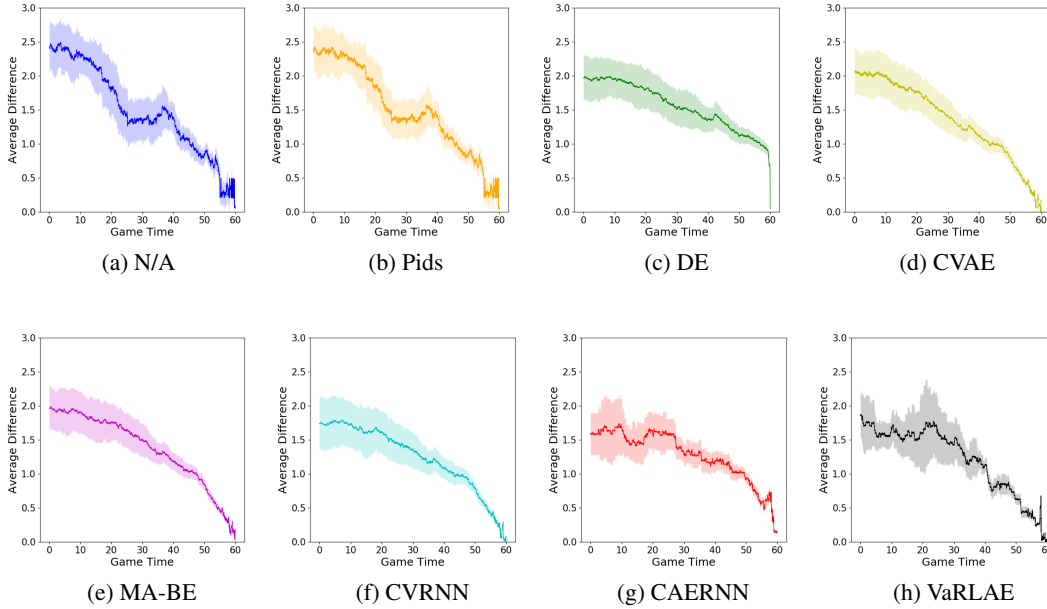

Figure 6: Temporal illustrations of the absolute error between predicted score differences and final score differences. We report mean $\pm$ variance of the error at each time step for all compared methods.

### 64 C.3 Posterior Collapse

65 Figure 7 shows the Kullback–Leibler Divergence (KLD) between the posterior and the context-  
 66 specific prior (for the variational encoders) during training. Among the studied methods, CVAE  
 67 quickly reduces KLD to a small value (around 0.0005) after training on only a few games, but its  
 68 performance is less unstable without modeling the game history. CVRNN converges slower and  
 69 the KLD gradually drops to a very small number (around  $3E-05$ ) after training, which indicates the  
 70 prior can replace the posterior and the decoder can generate the distribution of acting player without  
 71 the player representation. It is consistent without intuition that a high capacity decoder like RNN  
 72 can lead to posterior collapse [8]. Our VaRLAE significantly alleviates this problem by applying  
 73 a hierarchy of latent variables and a deterministic warm-up during training (Section 4). The KLD  
 74 reduces smoothly until it converges a value around 0.03.

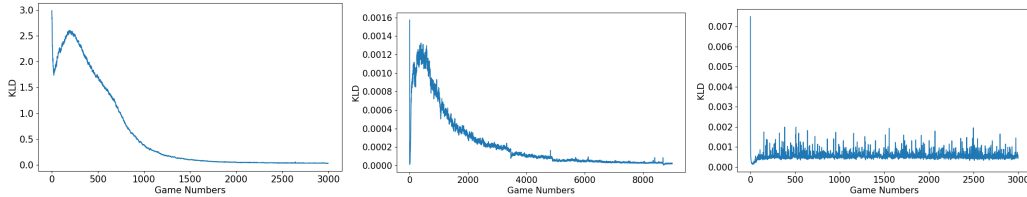

Figure 7: The KLD between the posteriors and the priors during training for VaRLAE , CVRNN and CVAE (from left to right).

## 75 References

- 76 [1] Casper Kaae Sønderby, Tapani Raiko, Lars Maaløe, Søren Kaae Sønderby, and Ole Winther.  
 77 Ladder variational autoencoders. In *Advances in Neural Information Processing Systems 29:  
 78 Annual Conference on Neural Information Processing Systems*, pages 3738–3746, 2016.
- 79 [2] Guiliang Liu and Oliver Schulte. Deep reinforcement learning in ice hockey for context-aware  
 80 player evaluation. In *Proceedings of the Twenty-Seventh International Joint Conference on  
 81 Artificially Intelligence, IJCAI*, pages 3442–3448, 2018.

- 82 [3] Matthew J. Hausknecht and Peter Stone. Deep recurrent q-learning for partially observable mdps.  
83 In *AAAI*, pages 29–37, 2015.
- 84 [4] Sujoy Ganguly and Nathan Frank. The problem with win probability. In *MIT Sloan Sports*  
85 *Analytics Conference*, 2018.
- 86 [5] Jacob Walker, Carl Doersch, Abhinav Gupta, and Martial Hebert. An uncertain future: Forecast-  
87 ing from static images using variational autoencoders. In *European Conference on Computer*  
88 *Vision, ECCV*, pages 835–851, 2016.
- 89 [6] Aditya Grover, Maruan Al-Shedivat, Jayesh K. Gupta, Yuri Burda, and Harrison Edwards.  
90 Learning policy representations in multiagent systems. In *Proceedings of the 35th International*  
91 *Conference on Machine Learning, ICML*, pages 1797–1806, 2018.
- 92 [7] Junyoung Chung, Kyle Kastner, Laurent Dinh, Kratarth Goel, Aaron C. Courville, and Yoshua  
93 Bengio. A recurrent latent variable model for sequential data. In *Advances in Neural Information*  
94 *Processing Systems 28: Annual Conference on Neural Information Processing Systems*, pages  
95 2980–2988, 2015.
- 96 [8] Qile Zhu, Wei Bi, Xiaojiang Liu, Xiyao Ma, Xiaolin Li, and Dapeng Oliver Wu. A batch  
97 normalized inference network keeps the KL vanishing away. *CoRR*, abs/2004.12585, 2020.
